# Supplementary material
Source: PubMed Central journal article supplement (PMC4011004)
Supplement: JB.00850-13_zjb999093066so1.pdf [file JB.00850-13_zjb999093066so1.pdf]

## Supplemental material

### **Myxobacteria produce outer membrane enclosed tubes in unstructured environments**

Xueming Wei, Christopher N. Vassallo, Darshankumar T. Pathak and Daniel Wall

Department of Molecular Biology, University of Wyoming , 1000 E. University Ave., Laramie,

WY 82071, U.S.A.

#### **Supplemental movie legends**

**Movie S1.** OMT anchors cell to glass slide. Thermal currents move cells and debris across field. A ~50  $\mu\text{M}$  long OMT attached to a glass surface holds a cell in place and then breaks releasing the cell. To increase fluorescent intensity of OMTs cells were double labeled with lipid dye DiIC and  $\text{SS}_{\text{OM}}$ -mCherry (DW1047). Cells are approximately 8  $\mu\text{M}$  long. Movie format is Audio Video Interleave (.avi).

**Movie S2.** Adhered cell cluster with oscillating OMTs. Real time video showing loops of OMTs jiggling in solution. Note cell detached OMT in the middle right field is attached to slide and also oscillates in solution currents. Cells and video format are as in Movie S1.

**Movie S3.** Lasso-like structures emanate and oscillate from cells adhered to glass. Cells and video format are as in Movie S1.
